# Supplementary material for: Engineering the future with hydrogels: advancements in energy storage devices and biomedical technologies
Source: Royal Society of Chemistry journal article supplement (doi:10.1039/d4nj00881b), 2024-01-01
Supplement: d4nj00881b1.pdf [file d4nj00881b1.pdf]

## Supporting informations

| Table S1. Materials, techniques and applications used in the preparation of hydrogels. |                                      |                                      |                                   |               |
|----------------------------------------------------------------------------------------|--------------------------------------|--------------------------------------|-----------------------------------|---------------|
| SN                                                                                     | Material                             | Technique (s)                        | Application (s)                   | Reference (s) |
| 1.                                                                                     | Gum arabic                           | Photo-induced radical polymerization | Self-healing hydrogel             | 45            |
| 2.                                                                                     | Polyethylene glycol (PEG)            | Chemical crosslinking                | Drug delivery                     | 46            |
|                                                                                        |                                      | Photo-polymerization                 | Implants                          | 47            |
|                                                                                        |                                      | Free-radical polymerization          | Scaffolds                         | 48            |
|                                                                                        |                                      | Gamma-radiation                      | Scaffolds                         | 49            |
| 3.                                                                                     | Hydroxyethyl cellulose (HEC)         | Chemical crosslinking                | Wound dressing                    | 50            |
|                                                                                        |                                      | Free-radical polymerization          | Self-healing                      | 51            |
|                                                                                        |                                      | Grafting                             | Bacteriostasis                    | 52            |
| 4.                                                                                     | Carboxymethyl cellulose (CMC)        | Freeze-thaw                          | Enzyme immobilization             | 53            |
|                                                                                        |                                      | Chemical crosslinking                | Drug carrier agent                | 54            |
|                                                                                        |                                      | Chemical crosslinking                | Hydrogel beads                    | 55            |
|                                                                                        |                                      | Copolymerization                     | Dye removal                       | 56            |
|                                                                                        |                                      | Chemical crosslinking                | Anti-counterfeiting and labelling | 57            |
|                                                                                        |                                      | Gamma radiation                      | Hemostat hydrogel                 | 58            |
|                                                                                        |                                      | Chemical crosslinking                | Photoluminescent                  | 59            |
|                                                                                        |                                      | Grafting                             | Metal ions removal                | 60            |
| 5.                                                                                     | Hydroxypropyl methylcellulose (HPMC) | Radiation                            | Scaffolds                         | 61            |
|                                                                                        |                                      | Chemical crosslinking                | Controlled release                | 62            |
|                                                                                        |                                      | Chemical crosslinking                | Drug delivery                     | 63            |

|     |                               |                        |                           |       |
|-----|-------------------------------|------------------------|---------------------------|-------|
|     |                               | Chemical crosslinking  | Thermoresponsive hydrogel | 64    |
| 6.  | Hydroxypropyl cellulose (HPC) | Chemical crosslinking  | Thermoresponsive hydrogel | 65    |
|     |                               | Photocrosslinking      | Biomedical                | 66    |
|     |                               | Pre-polymerization     | Anti-fouling              | 67    |
|     |                               | Freeze-thaw            | Biomedical                | 68    |
| 7.  | Starch                        | Radical polymerization | Wound dressing            | 69,70 |
|     |                               | Freeze-thaw            | Biomedical                | 71    |
| 8.  | Polyvinyl alcohol (PVA)       | Freeze-thaw            | Biomedical                | 72    |
|     |                               | Freeze-thaw            | Drug release              | 73    |
|     |                               | Freeze-thaw            | Radome materials          | 74    |
|     |                               | Freeze-thaw            | Regenerative medicines    | 75    |
| 9.  | Sterculia gum                 | Radiation-induced      | Biomedical                | 75    |
| 10. | Polyacryl amide               | Radiation-induced      | Agriculture               | 76    |
| 11. | Chitosan                      | Photo-polymerization   | Biomedical                | 77    |
|     |                               | Photo-polymerization   | Tissue adhesive           | 78    |
